# Supplementary material for: Transparent and flexible ZnO nanorods induced by thermal dissipation annealing without polymer substrate deformation for next-generation wearable devices
Source: Royal Society of Chemistry journal article supplement (doi:10.1039/d1ra02578c), 2021-01-01
Supplement: d1ra02578c1.pdf [file d1ra02578c1.pdf]

## Electronic Supplementary Information

# **Transparent and flexible ZnO nanorods induced by thermal dissipation annealing without polymer substrate deformation for next-generation wearable devices**

Dongwan Kim<sup>1</sup> and Jae-Young Leem<sup>1,\*</sup>

<sup>1</sup>Department of Nanoscience & Engineering, Inje University, 197, Inje-ro, Gimhae-si,  
Gyeongsangnam-do 621-749, Republic of Korea

\*Corresponding authors.

E-mail addresses: [jyleem@inje.ac.kr](mailto:jyleem@inje.ac.kr)

Tel.: +82-55-320-3716. Fax: +82-55-320-3631

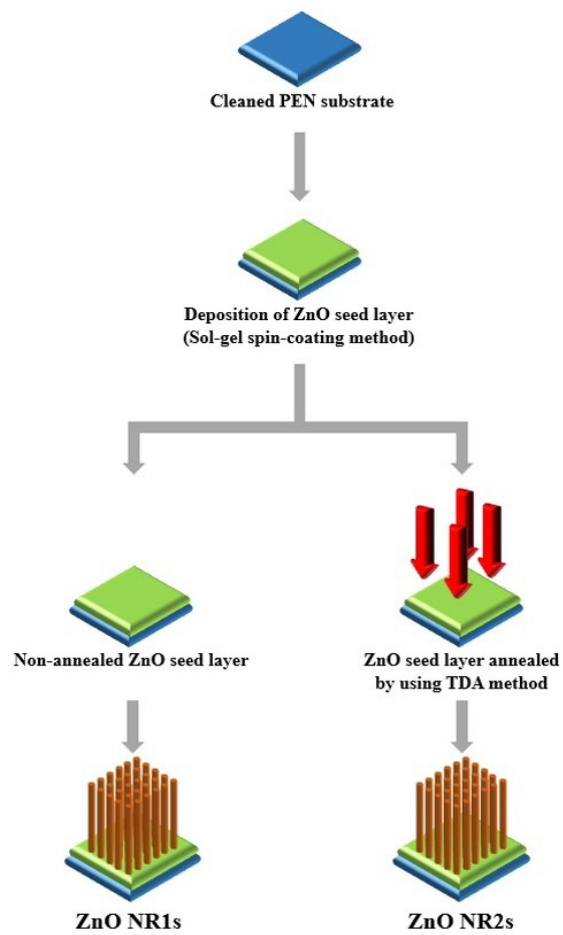

**Fig. S1.** Flow chart for the hydrothermally grown ZnO nanorods with two types of ZnO seed layer.

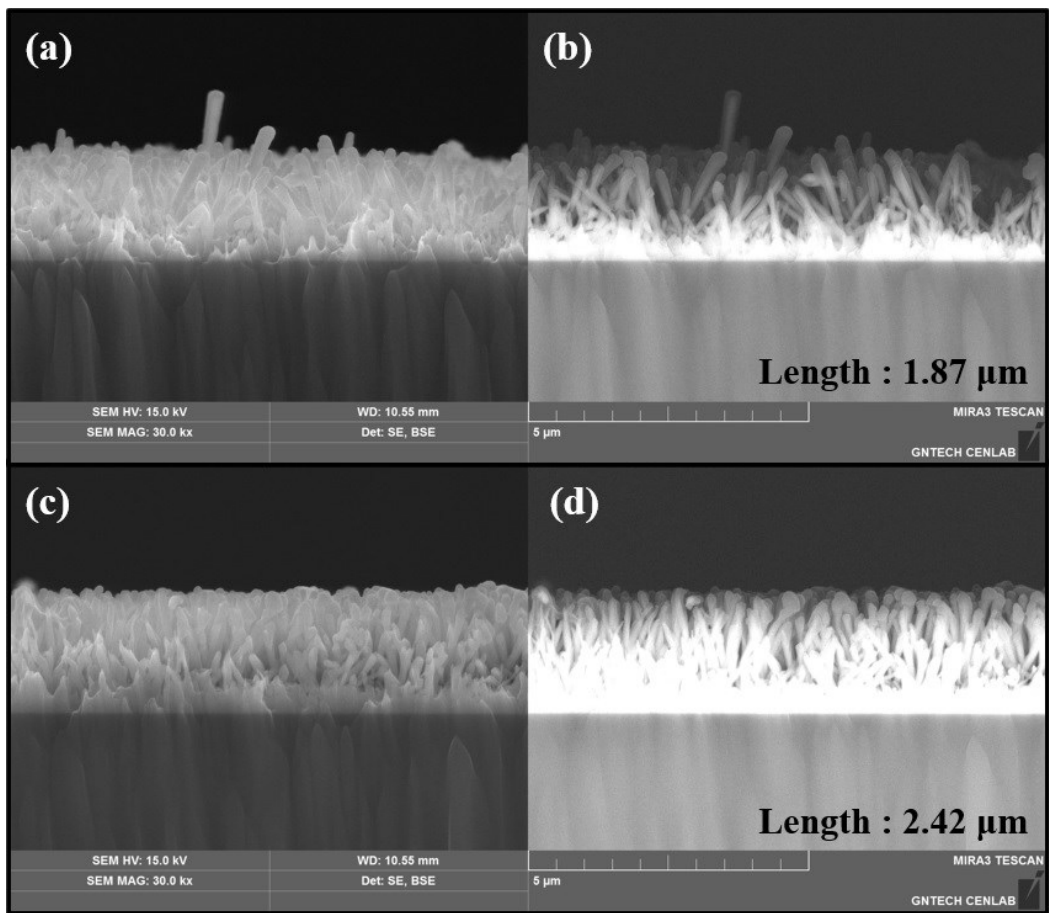

**Fig. S2.** Cross-sectional FE-SEM images of (a), (b) ZnO NR1s and (c), (d) ZnO NR2s polished via cross section polisher.
